## ANESTHESIOLOGY

# Non-steady State Modeling of the Ventilatory Depressant Effect of Remifentanyl in Awake Patients Experiencing Moderate-to-severe Obstructive Sleep Apnea

Anthony G. Doufas, M.D., Ph.D., Steven L. Shafer, M.D.,  
Nur Hashima Abdul Rashid, M.B.B.S., M.S., R.P.S.G.T.,  
Cleto A. Kushida, M.D., Ph.D.,  
Robson Capasso, M.D.

(ANESTHESIOLOGY 2019; 130:213–26)

Preoperative diagnosis of obstructive sleep apnea has been associated with an at least twofold increase in the risk for pulmonary complications in the first 24 h after surgery.<sup>1,2</sup> One proposed mechanism for this increased risk of complications is that obstructive sleep apnea increases patient's sensitivity to opioid-induced ventilatory depression.<sup>3,4</sup>

Experimental and clinical evidence demonstrate that intermittent hypoxia, a hallmark phenotype of obstructive sleep apnea, enhances sensitivity to the analgesic and ventilatory effects of opioids.<sup>5–7</sup> Retrospective analyses of life-threatening opioid-induced ventilatory events in the context of postoperative analgesia have shown obesity, somnolence, and a high risk for obstructive sleep apnea to be common among afflicted patients,<sup>8–10</sup> whereas opioids, when administered postoperatively, seem to aggravate sleep-disordered breathing in patients experiencing obstructive sleep apnea.<sup>11</sup> In spite of this evidence, studies that have formally assessed opioid-induced ventilatory depression in obstructive sleep apnea patients in comparison with controls are lacking. This knowledge gap has been recently identified by the assembly on Sleep and Respiratory Neurobiology in an official American Thoracic Society workshop.<sup>12</sup>

The aim of this prospective investigation was to compare the ventilatory depressant effect of remifentanyl, a short-acting

## ABSTRACT

**Background:** Evidence suggests that obstructive sleep apnea promotes postoperative pulmonary complications by enhancing vulnerability to opioid-induced ventilatory depression. We hypothesized that patients with moderate-to-severe obstructive sleep apnea are more sensitive to remifentanyl-induced ventilatory depression than controls.

**Methods:** After institutional approval and written informed consent, patients received a brief remifentanyl infusion during continuous monitoring of ventilation. We compared minute ventilation in 30 patients with moderate-to-severe obstructive sleep apnea diagnosed by polysomnography and 20 controls with no to mild obstructive sleep apnea per polysomnography. Effect site concentrations were estimated by a published pharmacologic model. We modeled minute ventilation as a function of effect site concentration and the estimated carbon dioxide. Obstructive sleep apnea status, body mass index, sex, age, use of continuous positive airway pressure, apnea/hypopnea events per hour of sleep, and minimum nocturnal oxygen saturation measured by pulse oximetry in polysomnography were tested as covariates for remifentanyl effect site concentration at half-maximal depression of minute ventilation ( $Ce_{50}$ ) and included in the model if a threshold of 6.63 ( $P < 0.01$ ) in the reduction of objective function was reached and improved model fit.

**Results:** Our model described the observed minute ventilation with reasonable accuracy (22% median absolute error). We estimated a remifentanyl  $Ce_{50}$  of  $2.20 \text{ ng} \cdot \text{ml}^{-1}$  (95% CI, 2.09 to 2.33). The estimated value for  $Ce_{50}$  was  $2.1 \text{ ng} \cdot \text{ml}^{-1}$  (95% CI, 1.9 to 2.3) in patients without obstructive sleep apnea and  $2.3 \text{ ng} \cdot \text{ml}^{-1}$  (95% CI, 2.2 to 2.5) in patients with obstructive sleep apnea, a statistically nonsignificant difference ( $P = 0.081$ ). None of the tested covariates demonstrated a significant effect on  $Ce_{50}$ . Likelihood profiling with the model including obstructive sleep apnea suggested that the effect of obstructive sleep apnea on remifentanyl  $Ce_{50}$  was less than 5%.

**Conclusions:** Obstructive sleep apnea status, apnea/hypopnea events per hour of sleep, or minimum nocturnal oxygen saturation measured by pulse oximetry did not influence the sensitivity to remifentanyl-induced ventilatory depression in awake patients receiving a remifentanyl infusion of  $0.2 \mu\text{g} \cdot \text{kg}^{-1}$  of ideal body weight per minute.

(ANESTHESIOLOGY 2019; 130:213–26)

## EDITOR'S PERSPECTIVE

## What We Already Know about This Topic

- Patients with obstructive sleep apnea are often said to have increased sensitivity to opioid-induced ventilatory depression

## What This Article Tells Us That Is New

- The hypothesis that patients with moderate-to-severe obstructive sleep apnea are more sensitive to remifentanyl-induced ventilatory depression was tested in 20 control patients with mild or no obstructive sleep apnea and 30 patients with moderate-to-severe obstructive sleep apnea, defined as an apnea/hypopnea index of 15 or more episodes per hour of sleep
- The predicted remifentanyl effect site concentration at which half-maximal depression of minute ventilation occurred in awake patients receiving a remifentanyl infusion of  $0.2 \mu\text{g} \cdot \text{kg}^{-1}$  of ideal body weight per minute did not differ between control patients and patients with moderate-to-severe obstructive sleep apnea
- This does not support the notion that adults with moderate-to-severe obstructive sleep apnea have increased sensitivity to opioid-induced ventilatory depression

$\mu$ -opioid receptor agonist, when administered as a brief infusion, between awake patients with moderate-to-severe obstructive sleep apnea and control patients who did not have moderate-to-severe obstructive sleep apnea. We hypothesized that patients with moderate-to-severe obstructive sleep apnea are more sensitive to remifentanyl-induced ventilatory depression.

## Materials and Methods

The study was approved by the Stanford Research Compliance Office, Stanford, California (Human Subjects Research and Institutional Review Board (IRB): [humansubjects.stanford.edu](http://humansubjects.stanford.edu); Protocol No.: IRB-29762, Primary Investigator: A. G. Doufas, M.D., Ph.D.). After written informed consent, we evaluated surgical patients at Stanford Medical Center in this prospective, observational cohort.

## Subjects

We recruited 50 patients between 18 and 70 yr old who were scheduled for head and neck surgery. Thirty patients had moderate-to-severe obstructive sleep apnea (obstructive sleep apnea group). These patients were scheduled for nasal, pharyngeal, or facial skeleton surgery for their obstructive sleep apnea, having failed, having refused, or wishing to discontinue continuous positive airway pressure treatment. Patients in the moderate-to-severe obstructive sleep apnea group had an apnea/hypopnea index of 15 or more episodes per hour of sleep during an in-laboratory or home-based polysomnography study. Twenty patients without obstructive sleep apnea, as indicated by a STOP-Bang (snoring, tiredness, observed apnea, blood pressure, BMI, age, neck circumference, gender as a screening tool for OSA)<sup>13</sup> score  $\leq 2$ , or mild obstructive sleep apnea (apnea/hypopnea index less than 15) served as the control group. These patients were undergoing similar surgery (*e.g.*, tonsillectomy or sinus surgery).

We excluded patients who were morbidly obese (body mass index greater than or equal to 35 kg/m<sup>2</sup>) and patients with severe neurologic, cardiopulmonary, or psychiatric

disease, as well as patients with chronic pain treated with opioids. Patients who were compliant with continuous positive airway pressure (*i.e.*, used continuous positive airway pressure more than 4.5 h per night<sup>14</sup>) were also excluded from participating in the study. Finally, we excluded patients who were scheduled to undergo drug-induced sleep endoscopy before surgery.

## Study Design

Study participants did not receive premedication before coming into the operating room. The study was conducted in the operating room before induction to general anesthesia.

In the operating room, patients lie supine on a regular operating table with their head and neck in a neutral position. After placement of standard American Society of Anesthesiologists anesthesia monitors (*i.e.*, electrocardiography, noninvasive blood pressure, and pulse oximetry), patients were connected to the anesthetic circuit through a tightly but comfortably fitting anesthesia pillow mask and breathed oxygen-enriched air (fraction of inspired oxygen: 0.5) throughout of the experiment. Extra care was taken to make sure that there was an adequate sealing of the anesthesia mask around the patient's mouth and nose.

After 3 min of stable breathing with no drug exposure, the study participants received a 10-min remifentanyl infusion at 0.2  $\mu\text{g} \cdot \text{kg}^{-1}$  of ideal body weight per minute, through an antecubital intravenous catheter, using an electronic syringe pump (Alaris; CareFusion, USA). The infusion rate was selected to reach a remifentanyl effect site concentration of approximately 4 ng  $\cdot \text{ml}^{-1}$  by the end of the 10-min infusion, based on pharmacokinetic/pharmacodynamic simulations<sup>15,16</sup> using ideal body weight.<sup>17,18</sup>

The experiment was terminated prematurely if remifentanyl-induced hypoventilation resulted in an oxygen saturation measured by pulse oximetry (SpO<sub>2</sub>) less than 85% for more than 10 s or apnea periods greater than 60 s. At that point ventilation was supported by the anesthesiologist.

## Measurements

All study participants were admitted to the sleep surgery division of the Department of Otolaryngology, Head & Neck Surgery at Stanford University, Stanford, California. Detailed information regarding their diagnoses and procedure indication were recorded, including their habitual daytime sleepiness using the Epworth sleepiness scale.<sup>19</sup> Demographic characteristics, including height, weight, age, sex, and race, were recorded on the day of the experiment. Ideal body weight was calculated from the height of the participants, based on the equations proposed by Devine<sup>20</sup> (*i.e.*, for men: ideal body weight = 49.9 + 0.89

This article is featured in "This Month in Anesthesiology," page 5A. Corresponding article on page 186. Supplemental Digital Content is available for this article. Direct URL citations appear in the printed text and are available in both the HTML and PDF versions of this article. Links to the digital files are provided in the HTML text of this article on the Journal's Web site ([www.anesthesiology.org](http://www.anesthesiology.org)). This article has an audio podcast. This article has a visual abstract available in the online version.

Submitted for publication January 2, 2018. Accepted for publication August 8, 2018. From the Department of Anesthesiology, Perioperative and Pain Medicine (A.G.D., S.L.S.), the Department of Psychiatry and Behavioral Sciences, and Stanford Center for Sleep Sciences and Medicine (C.A.K.); and the Department of Otolaryngology Head & Neck Surgery (R.C.), Stanford University School of Medicine, Stanford, California; the Outcomes Research Consortium, Cleveland, Ohio (A.G.D.); and the Department of Otorhinolaryngology, Faculty of Medicine and Health Sciences, Universiti Putra Malaysia, Selangor, Malaysia (N.H.A.R.).

[Ht - 152.4]; for women: ideal body weight = 45.4 + 0.89 [Ht - 152.4]).

The values for polysomnography parameters related to breathing (*i.e.*, the number of apneas or hypopneas per hour of sleep) and peripheral oxygenation (*i.e.*, the number of desaturation episodes by at least 3% [oxygen desaturation index], minimum nocturnal SpO<sub>2</sub>, and percentage of sleep time spent with an SpO<sub>2</sub> less than 90%) were collected from patients' electronic charts. Also, data on sleep efficiency (*i.e.*, the ratio of time spent asleep divided by the total recording time), use of continuous positive airway pressure, the type (laboratory- or home-based) and date of polysomnography, were also documented. All polysomnography studies were scored and evaluated in accordance with the 2012 update on the rules for scoring sleep-related respiratory events by the American Academy of Sleep Medicine.<sup>21</sup>

Before and during the remifentanyl infusion ventilatory parameters of interest (minute ventilation [ $\dot{V}_E$ ], expired tidal volume, ventilatory rate, and the partial pressure of end-tidal carbon dioxide) were measured through the anesthesia mask, using the standard flow sensor and monitors of an anesthesia workstation (Apollo; Dräger Medical GmbH, Germany). Data were captured directly from the anesthesia machine through a video camera that was focused on the monitor screen (displayed values are calculated over a 60-s moving window) and documented offline at 5-s intervals. This method of data collection was validated against proprietary software (Proto\_service, Dräger Medical GmbH, Germany), which downloads data directly from the anesthesia machine to a laptop computer at 5-s intervals, and found to be accurate (*i.e.*, the time courses of the ventilatory parameters between the two methods were extremely close).

Alertness of the study participants was evaluated at the beginning of the experiment and at the end of remifentanyl infusion using an 11-point verbal numerical rating scale (0: wide awake; 10: cannot keep my eyes open) and the 5-point responsiveness component of the observer's assessment alertness/sedation score (*i.e.*, 5: responds readily to name spoken in normal tone; 4: lethargic response to name spoken in normal tone; 3: responds only after name is spoken loudly and/or repeatedly; 2: responds only after mild prodding or shaking; 1: does not respond to mild prodding or shaking).<sup>22</sup>

## Data Analysis

Individual demographic and morphometric parameters are presented as number of patients, means  $\pm$  SDs, or medians (interquartile range). Friedman's supersmoother, a running-line smoother calculated using the R Language,<sup>23</sup> was used to compute the typical time course of all the collected ventilatory variables in each individual patient, thus facilitating visual exploration of measures of

ventilatory response. Compared with end-tidal carbon dioxide, tidal volume, or ventilatory rate,  $\dot{V}_E$  was the least noisy ventilatory response. We therefore selected  $\dot{V}_E$  as the high-resolution measure of remifentanyl-induced ventilatory depression.

**Pharmacologic Model.** Because this study was not performed at steady-state, we modeled drug effect as a function of predicted remifentanyl effect site concentration rather than as a function of remifentanyl infusion rate. We calculated remifentanyl plasma and effect site concentrations for each subject throughout remifentanyl infusion using a previously published three-compartment pharmacokinetic model<sup>15,16</sup> with an age-adjusted plasma effect site equilibration coefficient ( $k_{e0}$ ).<sup>15</sup> We used a previously developed inhibitory sigmoid pharmacodynamic model to describe the relationship between remifentanyl effect site concentration, and  $\dot{V}_E$ :<sup>24</sup>

$$\dot{V}_E(Ce) = \dot{V}_{E_0} - \left( \dot{V}_{E_0} - \dot{V}_{E_{\min}} \right) \frac{Ce^\gamma}{Ce_{50}^\gamma + Ce^\gamma} \quad (1)$$

The parameters of the model are the baseline ventilation ( $\dot{V}_{E_0}$ ), the minimum minute ventilation during remifentanyl infusion ( $\dot{V}_{E_{\min}}$ , expected to be 0 if the maximum effect or remifentanyl on ventilation is apnea), the remifentanyl concentration in the effect site associated with 50% of maximum effect ( $Ce_{50}$ ), and the exponent reflecting the steepness of the concentration *versus* effect relationship,  $\gamma$ .

Inspection of the raw data showed that ventilation usually increased toward the end of the remifentanyl infusion. We interpreted this as the stimulatory effect of accumulating carbon dioxide, similar to the observations by Bouillon *et al.* on the ventilatory effects of remifentanyl.<sup>25</sup> Bouillon *et al.* modeled the influence of carbon dioxide rise on ventilation as a hyperbolic function relating increasing carbon dioxide to increasing ventilatory drive,

$$\dot{V}_E(P_{EC}CO_2) = \dot{V}_{E_0} \cdot \left[ \frac{P_{EC}CO_2(t)}{P_{EC}CO_2(0)} \right]^F \quad (2)$$

where  $P_{EC}CO_2$  is the carbon dioxide (CO<sub>2</sub>) concentration at the hypothetical site of CO<sub>2</sub> effect on ventilation and  $F$  is the gain determining the change in  $\dot{V}_E$  for a given change in  $P_{EC}CO_2$  from time = 0 to time =  $t$ .  $P_{EC}CO_2$  was calculated using the model published by Bouillon *et al.* (Bouillon's tables 2 and 4, and equations 3 and 6).<sup>25</sup> We combined equations 1 and 2 to describe the net effect for any given remifentanyl effect site concentration and  $P_{EC}CO_2$ , on  $\dot{V}_E$  as the product of the sigmoid inhibitory model for the maximum drug effect ( $E_{\max}$ ) and the nonlinear term for the CO<sub>2</sub> response:

$$\dot{V}_E(Ce, PecCO_2) = \left[ V_{E_0} - (\dot{V}_{E_0} - \dot{V}_{E_{min}}) \frac{Ce^\gamma}{Ce_{50}^\gamma + Ce^\gamma} \right] \cdot \left[ \frac{PecCO_2(t)}{PecCO_2(0)} \right]^F \quad (3)$$

The calculations were performed in the R Language<sup>23</sup> (Supplemental Digital Content, <http://links.lww.com/ALN/B7821>, which lists the R code used to estimate the nonlinear term for the CO<sub>2</sub> response, based on Bouillon's model<sup>25</sup>), and was then input to the NONMEM code.

We estimated the model parameters using nonlinear mixed-effects modeling (NONMEM 7.3, ICON Development Solutions, Dublin, Ireland) with first-order conditional estimation.<sup>26</sup> NONMEM was deployed within the PLT Tools environment (PLTsoft, USA). We estimated the interindividual variability,  $\omega^2$ , for  $\dot{V}_{E_0}$  and  $Ce_{50}$  using additive and log-normal models, respectively. For the additive variance model, the coefficient of variation is  $\omega / P_{TV}$ , whereas for the exponential variance model, the coefficient of variation is approximately  $\omega$ , when  $\omega$  is small (e.g.,  $\omega < 0.3$ ).

Residual intraindividual error,  $\epsilon$ , was modeled with both additive and proportional error terms,

$$O_{i,j} = P_{i,j} (1 + \epsilon_1) + \epsilon_2 \quad (4)$$

where  $O_{i,j}$  is the  $j$ th observed value in the  $i$ th subject,  $P_{i,j}$  is the  $j$ th predicted value in the  $i$ th patient, and  $\epsilon_1$  and  $\epsilon_2$  are random variables with a mean of 0 and variance of  $\sigma_1^2$  and  $\sigma_2^2$ , respectively.

**Model Building.** We first modeled the effect of remifentanyl on ventilation using a sigmoidal model (equation 1) with interindividual variability on  $Ce_{50}$  and  $\dot{V}_{E_0}$ . Additional interindividual variance parameters introduced bias and model misspecification and were therefore excluded. The model consistently predicted more ventilatory depression than observed at the end of the infusion. This bias was removed by accounting for the stimulatory effects of accumulated carbon dioxide, as described above (equation 2). Models were evaluated based on the reduction in the NONMEM objective function ( $-2 \log$ -likelihood) and a reduction in the median absolute error (measured / predicted ventilation). The latter step was incorporated into the model building process because some parameters, including additional intersubject variance parameters, reduced the objective function but increased the absolute error and bias to the model, resulting in models that visually described the data appreciably less well than models with higher log-likelihoods.

**Model Evaluation.** Model fit was assessed by the NONMEM objective function, visual inspection of plots of the observed ( $\dot{V}_{E_{obs}}$ ) versus predicted  $\dot{V}_E$  ( $\dot{V}_{E_{pred}}$ ), linear regression, and

calculation of the median prediction error and median absolute prediction error.<sup>27</sup> Prediction error was estimated for each observation ( $\dot{V}_{E_{obs}}$ ) as percentage of the predicted  $\dot{V}_{E_{pred}}$ :

$$\text{Prediction Error} = \frac{\dot{V}_{E_{obs}} - \dot{V}_{E_{pred}}}{\dot{V}_{E_{pred}}} \times 100 \quad (5)$$

Prediction error, median prediction error, and median absolute prediction error were calculated for both the population and the *post hoc* individual model estimates.

Confidence in each pharmacodynamic parameter was assessed by using log-likelihood profiling and bootstrap analysis, as implemented within PLT Tools. The log-likelihood profile was calculated by plotting the objective function estimated for parameters near the final parameter estimate. Bootstrap analysis was used to estimate 95% CI for each parameter, by randomly sampling a new set from the patients' data, with replacement, and then repeating NONMEM estimation of the final model 1,000 times. According to the percentile method, the values between the 2.5 and the 97.5% rank of the distribution defined the 95% CI for each parameter. The log-likelihood profile addresses the confidence in the parameter relative to the overall model. The bootstrap analysis addresses the confidence in the parameter relative to the data.

To examine for a possible systematic bias in subjects with obstructive sleep apnea, the relationship between the predicted remifentanyl effect site concentration and the fractional decrease in  $\dot{V}_{E_0}$  measured (1-min average) at end-infusion was described and graphically presented by linear regression analysis, for the obstructive sleep apnea and control participants separately. Linear regression analysis was also used to describe the relationship between the total body weight of the participants and the cumulative dose of remifentanyl they received during the infusion. Regression slopes were compared between the obstructive sleep apnea and control participants.

**Covariate Analysis.** The effects of obstructive sleep apnea on remifentanyl-induced ventilatory depression were examined by testing prespecified covariates against  $Ce_{50}$ . Prespecified covariates of remifentanyl-induced ventilatory depression were study group (obstructive sleep apnea *vs.* controls, the primary hypothesis), body mass index, sex, age, apnea/hypopnea index, and minimum nocturnal SpO<sub>2</sub>. For the six control (non-obstructive sleep apnea) participants for whom polysomnography studies were not available, we imputed for apnea/hypopnea index and minimum nocturnal SpO<sub>2</sub> the values of 3 and 94, respectively. We also tested inadequate continuous positive airway pressure use, defined as more than 4.5 h per night, as a covariate of  $Ce_{50}$ . Covariates were included as additive effects on the  $Ce_{50}$ . Statistical significance was assessed by a decrease in objective function greater than 6.63 ( $\chi^2$  distribution for  $P < 0.01$  with one degree of freedom) with the introduction of a new covariate.



We directly tested our primary hypothesis that obstructive sleep apnea affected remifentanyl-induced ventilatory depression by calculating the log-likelihood profile of an additional parameter representing the effect of obstructive sleep apnea on the  $Ce_{50}$  for remifentanyl-induced ventilatory depression,

$$Ce_{50} = \theta_2 \cdot (1 + \theta_3 \cdot OSA) \quad (6)$$

where  $\theta_2$  is the population estimate of  $Ce_{50}$  in the absence of obstructive sleep apnea,  $\theta_2 \cdot (1 + \theta_3)$  is the population estimate of  $Ce_{50}$  in the presence of obstructive sleep apnea, and OSA is a binary 0 or 1 for the presence or absence, respectively, of obstructive sleep apnea. The log-likelihood profile provided an estimate of the sensitivity of the model to an effect of obstructive sleep apnea on remifentanyl-induced ventilatory depression.

We also conducted an unplanned exploratory analysis on the effects of the above covariate on  $\dot{V}_{E_0}$  and  $\gamma$ . All data processing, graphs, and statistical analyses other than that

performed with NONMEM were performed using the R Language,<sup>23</sup> RStudio (Version 1.0.143, USA), and Prism 7.0c (GraphPad Software, Inc., USA).

## Results

To recruit 50 study participants, we screened 101 patients between December 2015 and April 2017. According to the protocol, 30 participants had moderate-to-severe obstructive sleep apnea (apnea/hypopnea index exceeding 15 episodes per hour of sleep) and 20 had no (N = 9) to mild (N = 11) obstructive sleep apnea. Among the nine non-obstructive sleep apnea participants, six did not have a polysomnography study available and were recruited based on a STOP-Bang score of 2 or lower (one participant with 2, two with 1, and three with 0 score). Table 1 lists the demographic and morphometric characteristics of study participants, as well as baseline obstructive sleep apnea-related information and ventilation parameters. Figure 1 presents data on apnea/hypopnea index

**Table 1.** Demographics, Morphometrics, Polysomnography Descriptors, and Baseline Ventilation

|                                                                     | OSA<br>(AHI $\geq 15$ , N = 30) | Controls<br>(AHI < 15, N = 20) |
|---------------------------------------------------------------------|---------------------------------|--------------------------------|
| <b>Demographics and morphometrics</b>                               |                                 |                                |
| Age, yr                                                             | 43 $\pm$ 13                     | 34 $\pm$ 10                    |
| Female, n (%)                                                       | 4 (13)                          | 6 (30)                         |
| White race, n (%)                                                   | 18 (60)                         | 11 (55)                        |
| Height, cm                                                          | 178 (170–183)                   | 178 (164–181)                  |
| Total body weight, kg                                               | 87 (80–101)                     | 78 (73–95)                     |
| Ideal body weight, kg                                               | 72 (64–78)                      | 73 (57–76)                     |
| BMI, kg/m <sup>2</sup>                                              | 29 (26–33)                      | 28 (23–32)                     |
| BMI $\geq 30$ , n (%)                                               | 12 (40)                         | 7 (35)                         |
| ESS (0–24)                                                          | 10 (5–15)                       | 10 (6–13)                      |
| ESS > 10, n (%)                                                     | 15 (50)                         | 8 (40)                         |
| <b>Sleep study breathing and oxygenation variables</b>              |                                 |                                |
| Time interval between PSG and surgery, months                       | 10 (6–18)                       | 3 (2–17)                       |
| Overnight attended (Level I) PSG, n (%)                             | 21 (70)                         | 10 (71)                        |
| Sleep efficiency, %                                                 | 87 (75–92)                      | 93 (86–95)                     |
| Apnea/hypopnea index, events per hour of sleep                      | 38 (24–51)                      | 6 (5–12)                       |
| Fraction of hypopnea events during sleep ( $F_{\text{hypopneas}}$ ) | 0.78 (0.50–0.94)                | 0.97 (0.87–0.99)               |
| Oxygen desaturation index, events per hour of sleep*                | 23 (12–42)                      | 3 (2–5)                        |
| Minimum nocturnal SpO <sub>2</sub> , %                              | 83 (80–86)                      | 91 (86–92)                     |
| Time spent at SpO <sub>2</sub> < 90%, % of total sleep time†        | 1.12 (0.04–6.59)                | 0 (0–0.08)                     |
| Ever used CPAP treatment (noncompliant), n (%)                      | 12 (40)                         | 4 (29)                         |
| <b>Ventilation at baseline (3-min average)</b>                      |                                 |                                |
| Minute ventilation ( $\dot{V}_E$ ), l · min <sup>-1</sup>           | 6.5 (5.4–7.5)                   | 7.1 (5.6–8.9)                  |
| Breathing tidal volume ( $V_T$ ), ml                                | 590 (420–780)                   | 580 (400–790)                  |
| End-tidal pressure of carbon dioxide (PETCO <sub>2</sub> ), mmHg    | 38 (36–40)                      | 38 (36–39)                     |
| Respiratory rate (RR), breaths · min <sup>-1</sup>                  | 10 (8–13)                       | 11 (8–16)                      |

Continuous variables are reported as mean  $\pm$  SD, or median (interquartile range).

\*This variable indicates the number of breathing episodes where SpO<sub>2</sub> decreased by at least 3%. Only 25 from the 30 OSA and 9 from the 20 control participants had information on this PSG variable. †Only 25 from the 30 OSA and 12 from the 20 control participants had information on this PSG variable.

AHI, apnea/hypopnea index (events per hour of sleep); BMI, body mass index; CPAP, continuous positive airway pressure; ESS, Epworth sleepiness scale; OSA, obstructive sleep apnea; PSG, polysomnography; SpO<sub>2</sub>, oxyhemoglobin saturation by pulse oximetry.

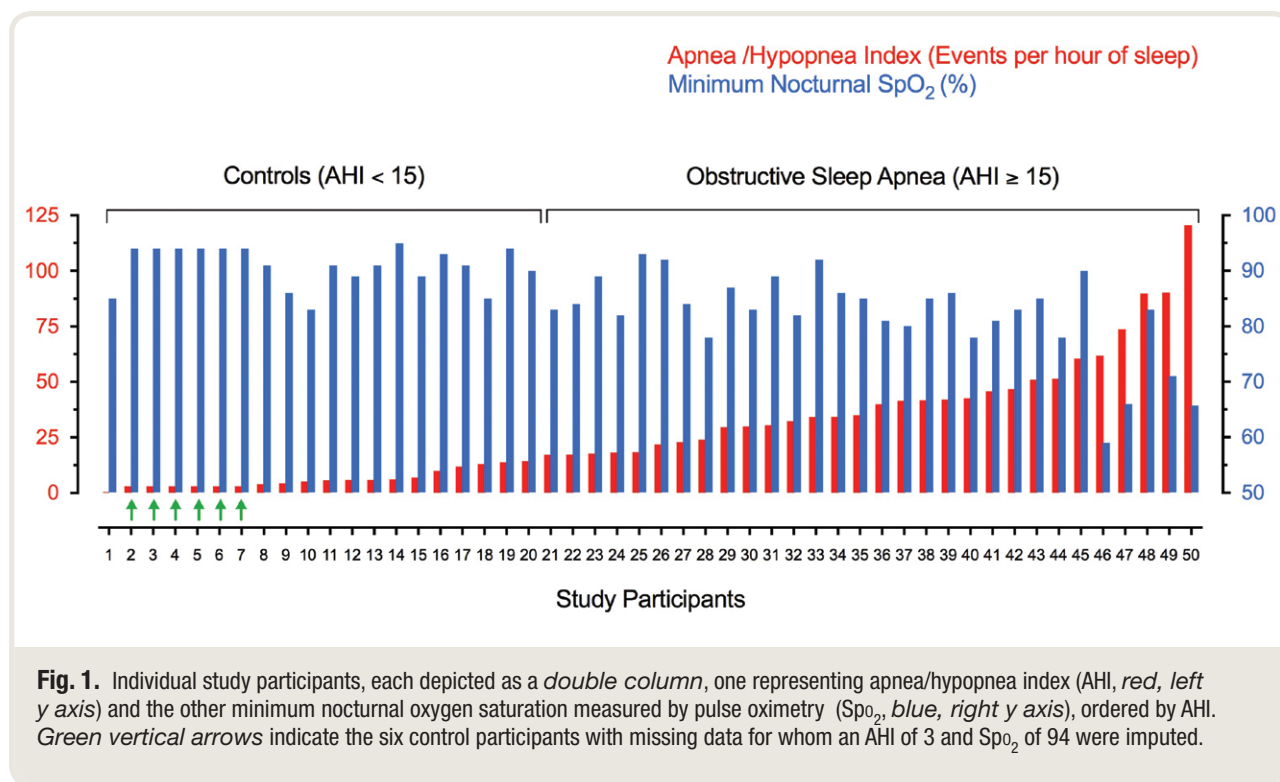

and minimum nocturnal SpO<sub>2</sub> for individual study participants ordered by increasing apnea/hypopnea index.

Figure 2 depicts the time course of recorded ventilatory parameters, including  $\dot{V}_E$ , expired tidal volume, ventilatory rate, and the partial pressure of end-tidal carbon dioxide, during the baseline and remifentanyl infusion phases of the experiment. The total median doses of remifentanyl administered in obstructive sleep apnea and control participants were 144  $\mu\text{g}$  (interquartile range: 128 to 156) and 146  $\mu\text{g}$  (113 to 156), respectively. During drug infusion, study participants experienced moderate-to-increased sleepiness (*i.e.*, up to 9 on a 0 to 10 scale), but none presented with an observer's assessment alertness/sedation score less than 4 (*i.e.*, lethargic response to name spoken in normal tone). None of the participants presented with an SpO<sub>2</sub> less than 92% as a result of remifentanyl-induced ventilatory depression.

Among the patient covariates, only age significantly affected the  $C_{e50}$  for remifentanyl-induced ventilatory depression, reducing the NONMEM objective function by eight points. Age was not included in the final model because its incorporation worsened rather than improved the population fit of the model to the data and did not appreciably change the parameter estimates.

Table 2 presents the parameters of the final model for remifentanyl-induced ventilatory depression estimated by NONMEM. The estimated typical value for  $C_{e50}$  was 2.20  $\text{ng} \cdot \text{ml}^{-1}$  (95% CI, 2.09 to 2.33; estimated by bootstrap resampling). The estimated value for  $C_{e50}$  was 2.1  $\text{ng} \cdot \text{ml}^{-1}$  (95% CI, 1.9 to 2.3) in patients without

obstructive sleep apnea, and 2.3  $\text{ng} \cdot \text{ml}^{-1}$  (95% CI, 2.2 to 2.5) in patients with obstructive sleep apnea, a statistically nonsignificant difference (unpaired *t* test,  $P = 0.081$ ). The population model (fig. 3) estimated the observed  $\dot{V}_E$  with reasonable accuracy (median prediction error of -3%, median absolute prediction error of 22%; fig. 3, A and C). The individual *post hoc* model did not show evidence of model misspecification (median prediction error of 0%, median absolute prediction error of 8%; fig. 3, B and D).

Figure 4 shows the contribution of remifentanyl (equation 1) and carbon dioxide (equation 2) on the predicted  $\dot{V}_E$  (dotted lines). The predicted  $\dot{V}_E$  closely follows the median observed  $\dot{V}_E$  (solid lines). Figure 5A shows the linear regression between the remifentanyl effect site concentration and the fractional decrease in  $\dot{V}_E$  at end-infusion, separately for the obstructive sleep apnea and control participants. The graph does not reveal any systematic bias regarding the obstructive sleep apnea subjects (*i.e.*, slope of the regression line was not statistically different from 0 for both study groups). Figure 5B shows the significant linear relationship between the cumulative dose of remifentanyl and total body weight in obstructive sleep apnea and control participants, separately. Comparison of the regression slopes did not reveal any statistically significant difference between the two groups.

Figure 6 shows the effect of obstructive sleep apnea on  $C_{e50}$ , determined by the log-likelihood profile of an additional parameter for the fractional effect of obstructive sleep apnea on  $C_{e50}$ . The estimated typical value for the effect of obstructive sleep apnea on  $C_{e50}$  was a 7% increase in  $C_{e50}$  in obstructive sleep apnea patients (*i.e.*, 7% decrease in

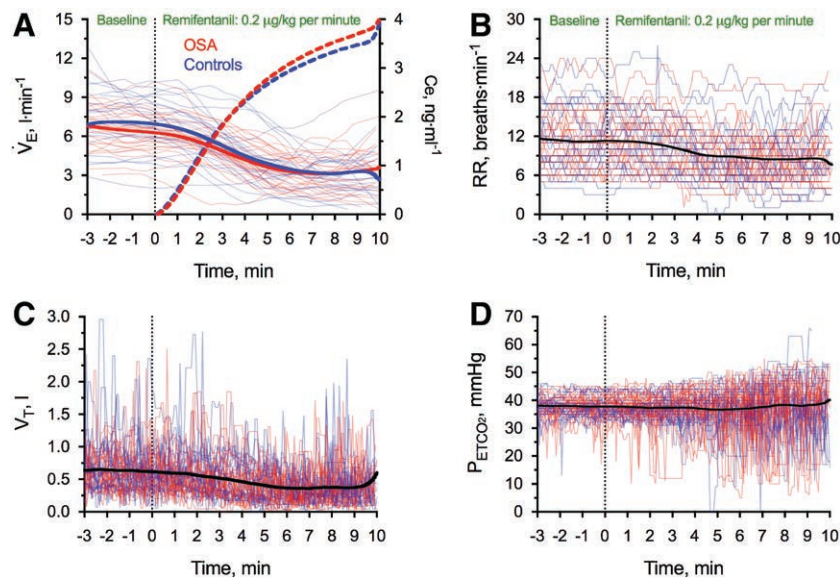

**Fig. 2.** Time course of the remifentanyl effect on minute ventilation ( $\dot{V}_E$ ; A), respiratory rate (RR; B), tidal volume ( $V_T$ ; C), and end-tidal pressure of carbon dioxide ( $P_{ETCO_2}$ ; D), during the 3-min baseline (no drug exposure) and the 10-min-long drug infusion. For each parameter, graphs present individual curves for obstructive sleep apnea (OSA; red) and control (blue) participants, separately, whereas in graph A, a heavier line of the same color, summarizing the effect of individual observations in the two groups, is also depicted. In the same graph (A), the summarized remifentanyl effect site concentration (Ce, right y axis) curve, is also presented as a heavier dotted line, separately for the two study groups, using the same color coding as above.

**Table 2.** Typical Parameter Values and Basic Statistics of the Pharmacodynamic Model Describing Remifentanyl-induced Ventilatory Depression

| Parameter                                           | $P_{TV}$ | $\omega^2$ | CV (%) | 1,000 Bootstraps<br>(median, 95% CI) | $\sigma_1^2, \sigma_2^2$ |
|-----------------------------------------------------|----------|------------|--------|--------------------------------------|--------------------------|
| $\dot{V}_{E0}, \text{l} \cdot \text{min}^{-1}$      | 6.58     | 3.32       | 27.7   | 6.59 (6.08–7.11)                     | 0.004,<br>0.37           |
| $Ce_{50}, \text{ng} \cdot \text{ml}^{-1}$           | 2.20     | 0.03       | 7.9    | 2.20 (2.09–2.33)                     |                          |
| $\dot{V}_{E_{min}}, \text{l} \cdot \text{min}^{-1}$ | 0*       | —          | —      | —                                    |                          |
| $\gamma$                                            | 3.55     | —          | —      | 3.55 (3.17–4.00)                     |                          |

\*Nonlinear mixed-effects modeling estimated a typical value of 0.001 for  $\dot{V}_{E_{min}}$ ; therefore, this parameter was fixed to zero in the final model.

$Ce_{50}$ , effect site concentration at half-maximal depression of minute ventilation; CV, coefficient of variation ( $=\sqrt{\omega^2} / P_{TV}$ );  $P_{TV}$ , typical parameter value;  $\dot{V}_{E_{min}}$ , baseline minute ventilation;  $\dot{V}_{E_{min}}$ , minimum minute ventilation;  $\gamma$ , shape of the sigmoid relationship between effect site concentration and minute ventilation;  $\sigma_1^2$ , variance of the intraindividual random effects ( $\epsilon$ ), modeled as both a proportional ( $\sigma_1^2$ ) and an additive ( $\sigma_2^2$ ) term;  $\omega^2$ , variance of the interindividual random effects.

remifentanyl sensitivity in obstructive sleep apnea patients). The 99% CI ranged from -5% to +21%. The log-likelihood profile includes 0, precluding a statistically significant effect. Additionally, the 99% CI suggests that the effect, if any, is not greater than a 5% reduction in  $Ce_{50}$ .

Exploratory covariate testing on  $\dot{V}_{E0}$  and  $\gamma$  revealed a significant effect of obstructive sleep apnea on  $\gamma$ , reducing the objective function by 100 points. Despite the statistical significance, the effect was clinically insignificant ( $\gamma$  of 3.36 for obstructive sleep apnea vs. 3.81 for controls) and not pursued further.

Figure 7 presents the log-likelihood profiles for all estimated model parameters, together with the associated 95% CI for their typical values, based on a 3.84-point reduction in the objective function.

## Discussion

We found that awake patients receiving a remifentanyl infusion of  $0.2 \mu\text{g} \cdot \text{kg}^{-1}$  of ideal body weight per minute with moderate-to-severe obstructive sleep apnea were not different from

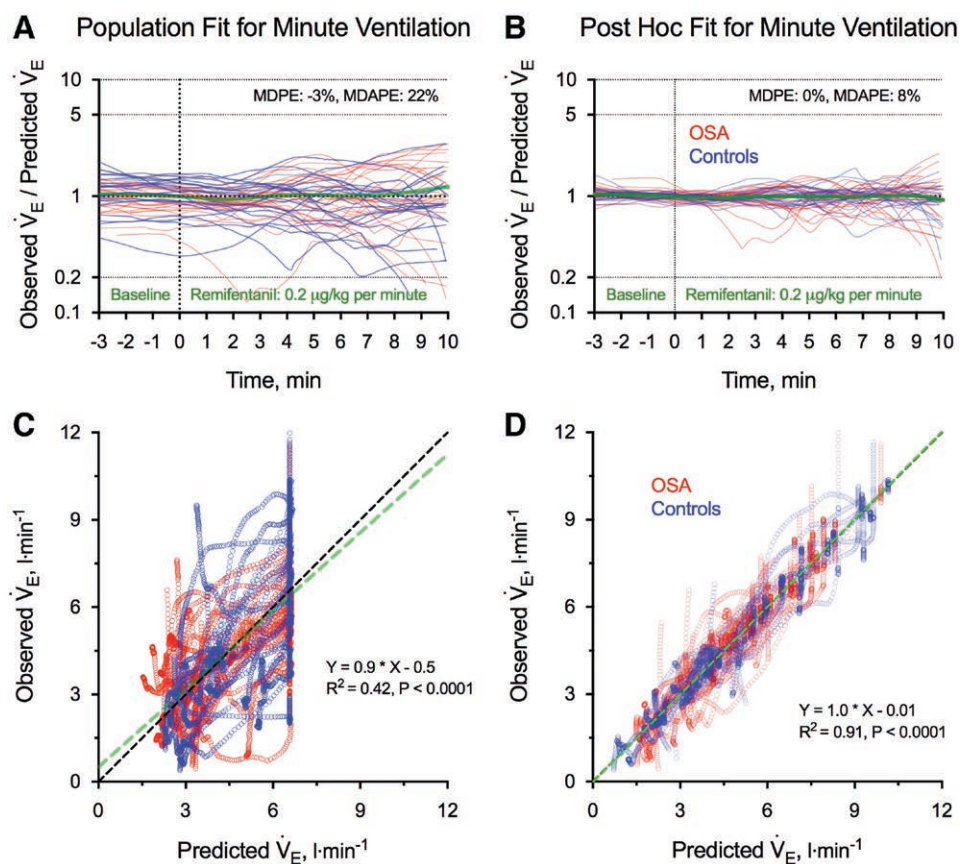

**Fig. 3.** Panels A and B present the ratio of the observed versus predicted minute ventilation ( $\dot{V}_E$ ) for the population (A) and the individual *post hoc* (B) model fits, as a function of time. Performance metrics for the respective models (*i.e.*, median prediction error [MDPE] and median absolute prediction error [MDAPE]) are also indicated. Panels C and D show the goodness of fit (green dotted line) for the population prediction (C) and the prediction based on the individual *post hoc* estimates (D) versus the observed minute ventilation, using linear regression (line of identity is depicted in black). The color of lines or dots discriminates between the two different study groups, as indicated in graphs B and D. OSA, obstructive sleep apnea (study group assignment: yes /no).

controls or patients with mild obstructive sleep apnea, with regard to the predicted remifentanyl  $C_{50}$ . Covariate analysis showed that neither apnea/hypopnea index nor minimum nocturnal  $\text{SpO}_2$  during polysomnography was a significant modifier of remifentanyl  $C_{50}$  for ventilatory depression.

It is important to emphasize what we did not find. We did not measure remifentanyl concentrations. As a result, our data do not tell us whether moderate-to-severe obstructive sleep apnea influences remifentanyl concentrations. For the same reason, our data do not tell us whether moderate-to-severe obstructive sleep apnea influences the ventilatory response to a given remifentanyl concentration. All we can state with moderate confidence is that moderate-to-severe obstructive sleep apnea does not influence the relationship between remifentanyl dose, reported as *predicted* remifentanyl effect site concentration, and ventilation.

We used predicted remifentanyl effect site concentration in our analysis, rather than dose, as recommended by

Avram,<sup>28</sup> who noted that “simply reporting the infusion rate of an intravenous anesthetic is akin to reporting only the vaporizer dial setting of a volatile anesthetic without reporting the fresh gas flow, the alveolar ventilation, and the many other factors that influence uptake and distribution of volatile anesthetics.”<sup>28</sup> Predicted effect site concentration is almost the only meaningful way, short of measuring plasma concentrations, to report the brain exposure for intravenous hypnotics and opioids. We could report the dose as micrograms per minute, but plasma remifentanyl concentrations responsible for the drug effect will be higher in small individuals than in large individuals receiving identical remifentanyl infusions (*i.e.*, same micrograms per minute). We could also report the dose as micrograms per kilogram per minute, but this will result in the opposite artifact: obese individuals will have higher plasma remifentanyl concentrations than individuals of normal size when given identical micrograms of



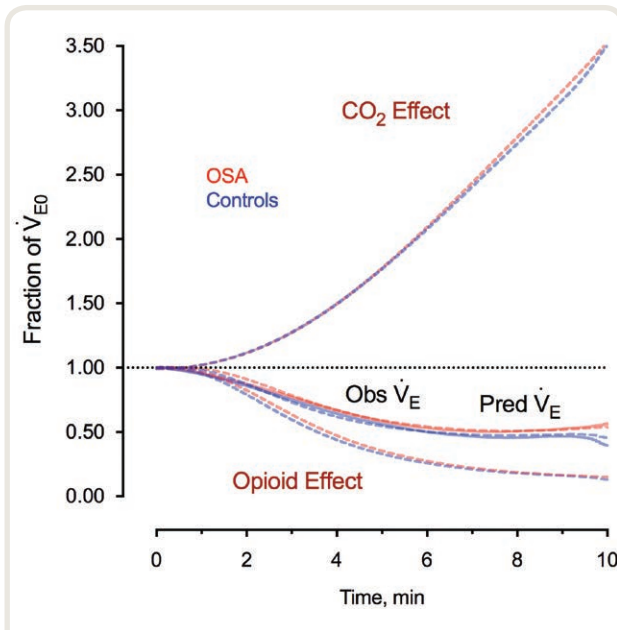

**Fig. 4.** This graph presents the separate contributions of the remifentanyl inhibitory (opioid effect) and the carbon dioxide ( $\text{CO}_2$ ) stimulatory effects on ventilation (fraction of  $\dot{V}_{E0}$ ), as these were combined in our final model, in relation to the predicted ( $\text{Pred } \dot{V}_E$ ) and observed ( $\text{Obs } \dot{V}_E$ ) ventilation. Predicted and observed parameters are depicted by dotted and solid lines, respectively. Color separates between obstructive sleep apnea (OSA; red) and controls (blue).

remifentanyl per kilogram per minute. In our study, we infused remifentanyl at 0.2 micrograms per kilogram of ideal body weight per minute. However, using this “dose”

in the analysis would compromise the ensuing analysis of the dose *versus* response relationship, because it does not correct for the increase in remifentanyl concentrations over time, nor does it incorporate the equilibration delay between the plasma concentration and the concentration at the site of drug effect (effect site concentration). Expressing dose as predicted effect site concentration, as recommended by Avram,<sup>28</sup> permits identifying the “dose” responsible for ventilatory depression in units independent of patient size, time, equilibration delay, and dose history.

Avram also recommended that predicted concentrations should not be used to develop pharmacokinetic and pharmacodynamic models.<sup>28</sup> We agree that models of underlying pharmacology should use measured concentrations. This study serves as an example. We cannot state whether moderate-to-severe obstructive sleep apnea affected the relationship between remifentanyl infusion rate and plasma concentration, nor can we state whether moderate-to-severe obstructive sleep apnea affected the relationship between plasma remifentanyl concentration and ventilation. However, that was not our goal. What we can state is that moderate-to-severe obstructive sleep apnea does not affect the relationship between remifentanyl dose and ventilation during a brief infusion.

There are other limitations that need to be addressed. We used the model reported by Minto *et al.*<sup>15,16</sup> The Minto model is based on a pharmacokinetic and pharmacodynamic study of patients with normal weight. Kim *et al.*<sup>29</sup> recently published a remifentanyl pharmacokinetic analysis incorporating obese patients. Because approximately 40% of our study participants were obese (body mass index greater than or equal to  $30 \text{ kg/m}^2$ ), we repeated the analysis

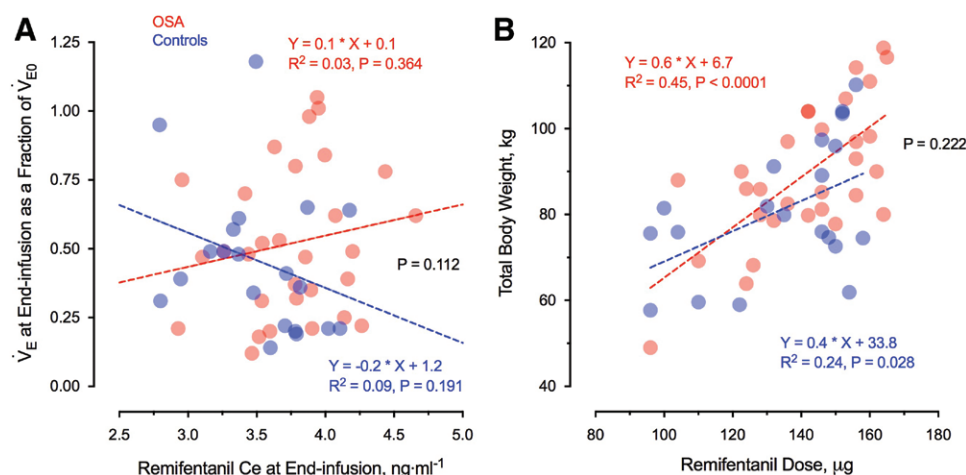

**Fig. 5.** Graph A depicts the relationship between the remifentanyl effect site concentration ( $C_e$ ) and the fractional decrease in baseline ventilation ( $\dot{V}_{E0}$ ) measured (1-min average) at end-infusion. Linear regression analysis did not reveal any systematic bias of the obstructive sleep apnea (OSA) subjects (*i.e.*, for both study groups, the slope of the regression line was not different than 0). Graph B shows the significant linear relationship between the cumulative dose of remifentanyl and total body weight in OSA and control participants, separately. Comparison of the regression slopes did not reveal any statistically significant difference between the two groups ( $P = 0.222$ ).

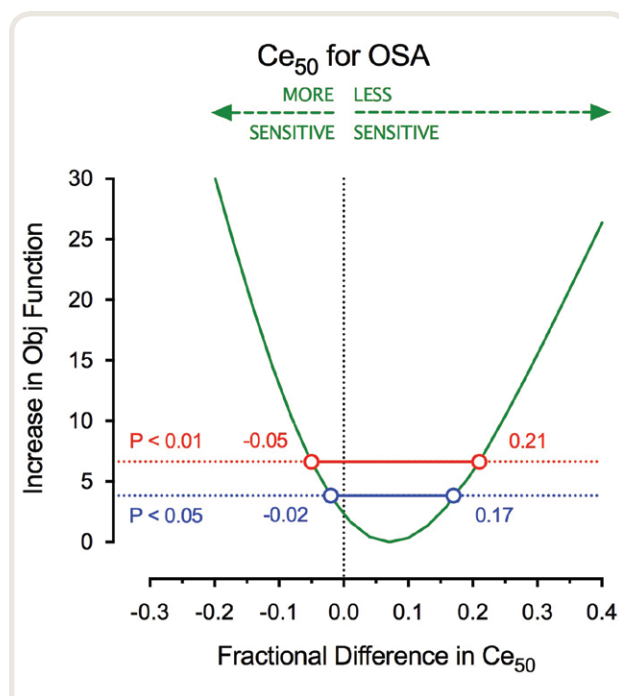

**Fig. 6.** Log-likelihood profile (green curve) of the parameter indicating the possible fractional difference between effect site concentration at half-maximal depression of minute ventilation ( $Ce_{50}$ ) in obstructive sleep apnea (OSA) and control participants. Black vertical dotted line indicates 0, whereas red and blue horizontal solid lines represent the estimated 99% and 95% CIs, respectively. Based on the study observations, nonlinear mixed-effects modeling estimated with high confidence that  $Ce_{50}$  for remifentanyl-induced ventilatory depression is greater in OSA than controls by approximately 7% (99% CI, -5 to 21). Obj, objective.

using remifentanyl effect site concentration predicted by the Kim model.<sup>29</sup> The results were nearly identical to the results obtained with the Minto model. Therefore, we have

retained the Minto model in the present study, because this is the model that has been incorporated in commercially available target controlled infusion devices.

There are several other limitations worth addressing. First, ventilation was measured using the flowmeters on the anesthesia machine, which could be less precise than using a laboratory-grade differential pressure spirometer. Second, no data were collected during remifentanyl washout. The modeling exercise would have been more robust had data been collected during both washin and washout. Unfortunately, because the study was conducted in surgical patients, further delay in surgery to capture ventilation during washout was considered clinically impractical. Finally, although the use of STOP-Bang (snoring, tiredness, observed apnea, blood pressure, BMI, age, neck circumference, gender as a screening tool for OSA) score, instead of polysomnography, to rule out moderate-to-severe obstructive sleep apnea in 6 of 20 control participants might be a source of concern, studies have shown that a STOP-Bang score less than 3 demonstrates higher than 80% probability to correctly exclude moderate-to-severe obstructive sleep apnea (apnea/hypopnea index greater than or equal to 15) in surgical patients.<sup>30</sup>

The infusion scheme we used did not allow the estimation of  $ke_0$  for the  $\dot{V}_E$  end point, and an encephalography-based ( $ke_0$  of  $0.52 \text{ min}^{-1}$ )<sup>15,16</sup> rather than ventilation-derived  $ke_0$  was used to calculate remifentanyl effect site concentration. However, human evidence supports a close pharmacodynamic link between the sedative, analgesic, and ventilatory depressant effects of opioids.<sup>31,32</sup> Furthermore, although ventilatory control is far more sensitive to the effect of opioids ( $C_{50}$  between  $0.7$  and  $3.3 \text{ ng} \cdot \text{ml}^{-1}$ , depending on the study method),<sup>33–36</sup> compared with spectral edge frequency of the electroencephalogram ( $C_{50}$  of  $11.2 \text{ ng} \cdot \text{ml}^{-1}$  in Minto *et al.*<sup>15</sup> and  $19.9 \text{ ng} \cdot \text{ml}^{-1}$  in Egan *et al.*<sup>37</sup>), studies have estimated similar  $ke_0$  values for the electroencephalogram ( $ke_0$  of  $0.43 \text{ min}^{-1}$  in Egan

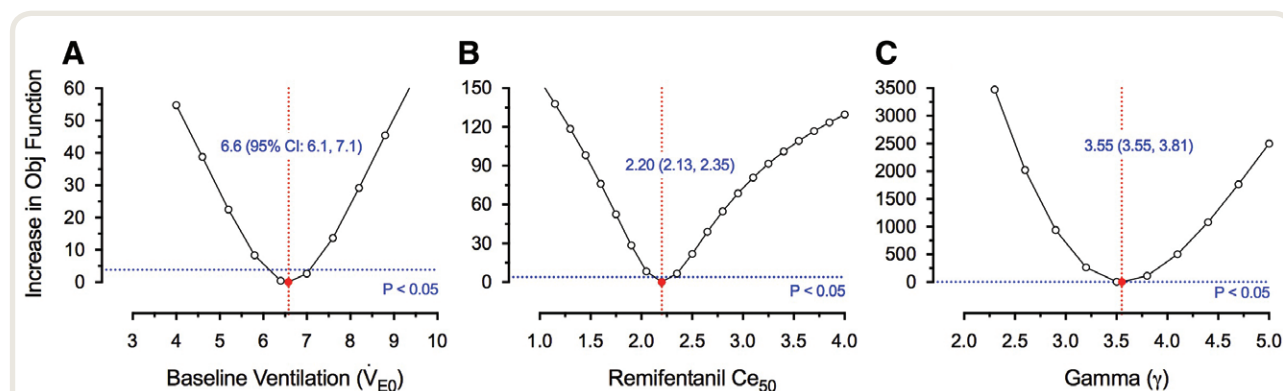

**Fig. 7.** Log-likelihood profiles of the model parameters, including baseline ventilation ( $\dot{V}_{E0}$ ; A), remifentanyl effect site concentration at half-maximal depression of minute ventilation ( $Ce_{50}$ ; B), and  $\gamma$  (C). Significance threshold at  $P < 0.05$  is indicated by the dotted blue line, whereas 95% CIs for the typical values (indicated by the dotted vertical red line) of model parameters are also presented. Obj, objective.

*et al.*<sup>37</sup> and  $0.52 \text{ min}^{-1}$  in Minto *et al.*<sup>15</sup>) and ventilatory (*i.e.*,  $\text{ke}_0$  values between  $0.34$  and  $1.30 \text{ min}^{-1}$ )<sup>34–36</sup> end points. As a consequence, our model produced an accurate fit of the observed  $\dot{V}_E$  with a median prediction error of  $-3\%$  and median absolute prediction error of  $22\%$  for the population, and median prediction error of  $0\%$  and median absolute prediction error of  $8\%$  for the *post hoc* individual estimates. The time course of drug effect, as well as the maximum ventilatory depressant effect of remifentanyl, were comparable with those demonstrated previously in healthy subjects by simulating similar infusion schemes for remifentanyl.<sup>25,36,38</sup>

The effect of opioids on ventilation is offset, in part, by the effect of  $\text{Paco}_2$  on ventilatory drive. In poikilocapnic (free-floating carbon dioxide) study designs, the  $C_{50}$  of an opioid is therefore a function of  $\text{Paco}_2$ . When  $\text{Paco}_2$  information is available through arterial sampling, non-steady-state modeling of the ventilatory depressant effects of opioids can incorporate the stimulating effect of carbon dioxide on ventilation in a *context-specific* potency ( $C_{50}$ ) of the opioid.<sup>25,36</sup> We accounted for the ventilatory stimulatory effects of carbon dioxide using the model developed by Bouillon *et al.*<sup>25</sup> The basic assumption of our modeling, that the carbon dioxide responsiveness (represented by the gain  $F$  in equations 2 and 3) is similar between obstructive sleep apnea and control participants, is supported by literature evidence in awake humans.<sup>39,40</sup>

Our estimated  $C_{e50}$  for remifentanyl-induced ventilatory depression ( $2.20 \text{ ng} \cdot \text{ml}^{-1}$ ) is consistent with values in studies incorporating the effect of carbon dioxide on remifentanyl-induced ventilatory depression, either in non-steady-state conditions, as in Olofson *et al.*<sup>36</sup> ( $C_{50}$  of  $1.6 \text{ ng} \cdot \text{ml}^{-1}$ ) and Bouillon *et al.*<sup>25</sup> ( $C_{50}$  of  $0.92 \text{ ng} \cdot \text{ml}^{-1}$ ), or in isohypercapnic experiments by Babenco *et al.*<sup>34</sup> ( $C_{50}$  of  $1.4 \text{ ng} \cdot \text{ml}^{-1}$ ) and Nieuwenhuijs *et al.*<sup>33</sup> ( $C_{50}$  of  $0.7 \text{ ng} \cdot \text{ml}^{-1}$ ). These  $C_{50}$  values are lower than those estimated by Nieuwenhuijs *et al.*<sup>33</sup> ( $C_{50}$  of  $3.3 \text{ ng} \cdot \text{ml}^{-1}$ ) and Dahan *et al.*<sup>35</sup> ( $C_{50}$  of  $2.6 \text{ ng} \cdot \text{ml}^{-1}$ ), using models that did not account for the stimulating effect of carbon dioxide on ventilation.

Obstructive sleep apnea is a common but highly heterogeneous disorder.<sup>41</sup> We based obstructive sleep apnea diagnosis on overnight polysomnography and clinical symptoms, but did not proceed to deep phenotyping<sup>42,43</sup> (*i.e.*, evaluating airway muscles responsiveness, ventilatory control loop gain, and arousal threshold) of our patients. Important obstructive sleep apnea phenotypes, like the loop gain of respiratory chemosensory controller (chemical loop gain: the ratio of the magnitude of the change in ventilation to the magnitude of the change in  $\text{Paco}_2$  or  $\text{PaO}_2$ <sup>44</sup>) and arousal threshold (*i.e.*, the level of ventilatory effort during airway obstruction that is associated with arousal and termination of hypopnea), have major implications for the airway stability during sleep,<sup>43,45</sup> especially in obstructive sleep apnea patients with moderate anatomical impairment.<sup>42</sup> These more complex phenotypes appear responsible for the

observed variability in the response to benzodiazepines,<sup>46,47</sup> opioids,<sup>48,49</sup> or oxygen administration.<sup>50</sup>

Our results may not apply to other obstructive sleep apnea populations, to patients in other clinical settings, and even to our study participants when sedated or asleep. Because of the arousal state dependency of central ventilatory control,<sup>51</sup> especially in obstructive sleep apnea,<sup>52,53</sup> the pharmacologic concept of *ventilatory sensitivity to opioids* may degenerate during sleep (either natural or pharmacologically induced sleep), when a dissociation between central ventilatory drive and airway function occurs. For example, sleeping/sedated patients with intact (or even heightened, as a result of hypercapnia) ventilatory drive may demonstrate heavily depressed ventilation attributable to severe upper airway obstruction, a phenomenon that commonly appears in obstructive sleep apnea. How an opioid (used in moderation) could affect such a scenario is not easy to predict and would depend on several factors, including those reported above. Although a recent systematic review of the actions of opioids and hypnotics on the severity of sleep-disordered breathing have overall demonstrated no effect,<sup>54</sup> we need to emphasize that our findings pertain to awake patients with obstructive sleep apnea and exercise caution when opioids are administered to patients with decreased state of arousal.

During the experiment, remifentanyl increased subjective sleepiness by roughly 5 units (in a 0 to 10 verbal scale), independently of the obstructive sleep apnea status. An objective assessment, using the responsiveness component of observer's assessment alertness/sedation score,<sup>22</sup> revealed only mild drowsiness, as others have previously documented using both clinical<sup>34</sup> and encephalography-based<sup>33,36</sup> instruments, at similar drug concentrations. Thus, although we cannot exclude the possibility that the sedative effect of remifentanyl might have influenced its effect on ventilation (a state-dependent function<sup>51</sup>) by causing a right shift in the ventilatory response to carbon dioxide,<sup>55</sup> it is rather unlikely that this effect was significant or modified by obstructive sleep apnea status.

In summary, we found that among surgical patients, those who experience moderate-to-severe obstructive sleep apnea are not more sensitive to the ventilatory depressant effect of remifentanyl than non-obstructive sleep apnea patients or patients with mild obstructive sleep apnea. Neither the number of obstructed breathing events nor the minimum  $\text{SpO}_2$  during sleep were found to have a significant independent influence on the sensitivity to remifentanyl-induced ventilatory depression.

## Acknowledgments

The authors thank their colleagues from the Ear, Nose and Throat surgery anesthesia team at the Department of Anesthesiology, Perioperative and Pain Medicine, Stanford

University School of Medicine, Stanford, California, who have greatly facilitated this project by allowing us the extra time required for the experiment before anesthetic induction, and Ronald G. Pearl, M.D., Ph.D., Chair at the Department of Anesthesiology, Perioperative and Pain Medicine, Stanford University School of Medicine, for the useful discussions on parts of the methods.

## Research Support

Support was provided solely from departmental sources.

## Competing Interests

The authors declare no competing interests.

## Correspondence

Address correspondence to Dr. Doufas: Department of Anesthesiology, Perioperative and Pain Medicine, Stanford University School of Medicine, 300 Pasteur Drive, Stanford, California 94305. [agdoufas@stanford.edu](mailto:agdoufas@stanford.edu). This article may be accessed for personal use at no charge through the Journal Web site, [www.anesthesiology.org](http://www.anesthesiology.org).

## References

1. Mokhlesi B, Hovda MD, Vekhter B, Arora VM, Chung F, Meltzer DO: Sleep-disordered breathing and postoperative outcomes after elective surgery: Analysis of the nationwide inpatient sample. *Chest* 2013; 144:903–14
2. Oppenheimer M, Cozowicz C, Bugada D, Mokhlesi B, Kaw R, Auckley D, Chung F, Memtsoudis SG: Does obstructive sleep apnea influence perioperative outcome? A qualitative systematic review for the Society of Anesthesia and Sleep Medicine Task Force on preoperative preparation of patients with sleep-disordered breathing. *Anesth Analg* 2016; 122:1321–34
3. Chung F, Liao P, Yang Y, Andrawes M, Kang W, Mokhlesi B, Shapiro CM: Postoperative sleep-disordered breathing in patients without preoperative sleep apnea. *Anesth Analg* 2015; 120:1214–24
4. Cozowicz C, Chung F, Doufas AG, Nagappa M, Memtsoudis SG: Opioids for acute pain management in patients with obstructive sleep apnea: A systematic review. *Anesth Analg* 2018 [Epub ahead of print]. doi: 10.1213/ANE.0000000000003549.
5. Brown KA, Laferrière A, Lakheeram I, Moss IR: Recurrent hypoxemia in children is associated with increased analgesic sensitivity to opiates. *ANESTHESIOLOGY* 2006; 105:665–9
6. Doufas AG, Tian L, Padrez KA, Suwanprathes P, Cardell JA, Maecker HT, Panousis P: Experimental pain and opioid analgesia in volunteers at high risk for obstructive sleep apnea. *PLoS One* 2013; 8:e54807
7. Moss IR, Brown KA, Laferrière A: Recurrent hypoxia in rats during development increases subsequent respiratory sensitivity to fentanyl. *ANESTHESIOLOGY* 2006; 105:715–8
8. Lee LA, Caplan RA, Stephens LS, Posner KL, Terman GW, Voepel-Lewis T, Domino KB: Postoperative opioid-induced respiratory depression: A closed claims analysis. *ANESTHESIOLOGY* 2015; 122:659–65
9. Ramachandran SK, Haider N, Saran KA, Mathis M, Kim J, Morris M, O'Reilly M: Life-threatening critical respiratory events: A retrospective study of postoperative patients found unresponsive during analgesic therapy. *J Clin Anesth* 2011; 23:207–13
10. Weingarten TN, Chong EY, Schroeder DR, Sprung J: Predictors and outcomes following naloxone administration during Phase I anesthesia recovery. *J Anesth* 2016; 30:116–22
11. Chung F, Liao P, Elsaid H, Shapiro CM, Kang W: Factors associated with postoperative exacerbation of sleep-disordered breathing. *ANESTHESIOLOGY* 2014; 120:299–311
12. Ayas NT, Laratta CR, Coleman JM, Doufas AG, Eikermann M, Gay PC, Gottlieb DJ, Gurubhagavatula I, Hillman DR, Kaw R, Malhotra A, Mokhlesi B, Morgenthaler TI, Parthasarathy S, Ramachandran SK, Strohl KP, Strollo PJ, Twery MJ, Zee PC, Chung FF; ATS Assembly on Sleep and Respiratory Neurobiology: Knowledge gaps in the perioperative management of adults with obstructive sleep apnea and obesity hypoventilation syndrome: An official American Thoracic Society workshop report. *Ann Am Thorac Soc* 2018; 15:117–26
13. Chung F, Yegneswaran B, Liao P, Chung SA, Vairavanathan S, Islam S, Khajehdehi A, Shapiro CM: STOP questionnaire: A tool to screen patients for obstructive sleep apnea. *ANESTHESIOLOGY* 2008; 108:812–21
14. Reeves-Hoche MK, Meck R, Zwillich CW: Nasal CPAP: An objective evaluation of patient compliance. *Am J Respir Crit Care Med* 1994; 149:149–54
15. Minto CF, Schnider TW, Egan TD, Youngs E, Lemmens HJ, Gambus PL, Billard V, Hoke JF, Moore KH, Hermann DJ, Muir KT, Mandema JW, Shafer SL: Influence of age and gender on the pharmacokinetics and pharmacodynamics of remifentanyl. I. Model development. *ANESTHESIOLOGY* 1997; 86:10–23
16. Minto CF, Schnider TW, Shafer SL: Pharmacokinetics and pharmacodynamics of remifentanyl. II. Model application. *ANESTHESIOLOGY* 1997; 86:24–33



17. Bouillon T, Shafer SL: Does size matter? *ANESTHESIOLOGY* 1998; 89:557–60
18. Egan TD, Huizinga B, Gupta SK, Jaarsma RL, Sperry RJ, Yee JB, Muir KT: Remifentanyl pharmacokinetics in obese *versus* lean patients. *ANESTHESIOLOGY* 1998; 89:562–73
19. Johns MW: A new method for measuring daytime sleepiness: The Epworth sleepiness scale. *Sleep* 1991; 14:540–5
20. Devine BJ: Gentamicin therapy. *Drug Intell Clin Pharm* 1974;650–5
21. Berry RB, Budhiraja R, Gottlieb DJ, Gozal D, Iber C, Kapur VK, Marcus CL, Mehra R, Parthasarathy S, Quan SF, Redline S, Strohl KP, Davidson Ward SL, Tangredi MM; American Academy of Sleep Medicine: Rules for scoring respiratory events in sleep: Update of the 2007 AASM Manual for the Scoring of Sleep and Associated Events. Deliberations of the Sleep Apnea Definitions Task Force of the American Academy of Sleep Medicine. *J Clin Sleep Med* 2012; 8:597–619
22. Chernik DA, Gillings D, Laine H, Hendler J, Silver JM, Davidson AB, Schwam EM, Siegel JL: Validity and reliability of the Observer's Assessment of Alertness/Sedation Scale: Study with intravenous midazolam. *J Clin Psychopharmacol* 1990; 10:244–51
23. R Core Team: A Language and Environment for Statistical Computing, 3.4.0 Edition. Vienna, Austria, R Foundation for Statistical Computing, 2017
24. Bouillon T, Schmidt C, Garstka G, Heimbach D, Stafforst D, Schwilden H, Hoeft A: Pharmacokinetic-pharmacodynamic modeling of the respiratory depressant effect of alfentanil. *ANESTHESIOLOGY* 1999; 91:144–55
25. Bouillon T, Bruhn J, Radu-Radulescu L, Andresen C, Cohane C, Shafer SL: A model of the ventilatory depressant potency of remifentanyl in the non-steady state. *ANESTHESIOLOGY* 2003; 99:779–87
26. Beal SL, Sheiner LB: NONMEM Users Guide, parts I & II. San Francisco, University of California, 1980
27. Varvel JR, Donoho DL, Shafer SL: Measuring the predictive performance of computer-controlled infusion pumps. *J Pharmacokinet Biopharm* 1992; 20:63–94
28. Avram MJ: Presenting data *versus* predictions as basic scientific information: Target-controlled infusions *versus* microgram per kilogram per minutes. *ANESTHESIOLOGY* 2011; 114:723
29. Kim TK, Obara S, Egan TD, Minto CF, La Colla L, Drover DR, Vuyk J, Mertens M; the Remifentanyl Pharmacokinetics in Obesity Investigators: Disposition of remifentanyl in obesity: A new pharmacokinetic model incorporating the influence of body mass. *ANESTHESIOLOGY* 2017; 126:1019–32
30. Nagappa M, Liao P, Wong J, Auckley D, Ramachandran SK, Memtsoudis S, Mokhlesi B, Chung F: Validation of the STOP-Bang Questionnaire as a screening tool for obstructive sleep apnea among different populations: A systematic review and meta-analysis. *PLoS One* 2015; 10:e0143697
31. Montandon G, Cushing SL, Campbell E, Propst EJ, Horner RL, Narang I: Distinct cortical signatures associated with sedation and respiratory rate depression by morphine in a pediatric population. *ANESTHESIOLOGY* 2016; 125:889–903
32. Dahan A, Romberg R, Teppema L, Sarton E, Bijl H, Olofsen E: Simultaneous measurement and integrated analysis of analgesia and respiration after an intravenous morphine infusion. *ANESTHESIOLOGY* 2004; 101:1201–9
33. Nieuwenhuijs DJ, Olofsen E, Romberg RR, Sarton E, Ward D, Engbers F, Vuyk J, Mooren R, Teppema LJ, Dahan A: Response surface modeling of remifentanyl-propofol interaction on cardiorespiratory control and bispectral index. *ANESTHESIOLOGY* 2003; 98:312–22
34. Babenco HD, Conard PF, Gross JB: The pharmacodynamic effect of a remifentanyl bolus on ventilatory control. *ANESTHESIOLOGY* 2000; 92:393–8
35. Dahan A, Douma M, Olofsen E, Niesters M: High inspired oxygen concentration increases the speed of onset of remifentanyl-induced respiratory depression. *Br J Anaesth* 2016; 116:879–80
36. Olofsen E, Boom M, Nieuwenhuijs D, Sarton E, Teppema L, Aarts L, Dahan A: Modeling the non-steady state respiratory effects of remifentanyl in awake and propofol-sedated healthy volunteers. *ANESTHESIOLOGY* 2010; 112:1382–95
37. Egan TD, Minto CF, Hermann DJ, Barr J, Muir KT, Shafer SL: Remifentanyl *versus* alfentanil: Comparative pharmacokinetics and pharmacodynamics in healthy adult male volunteers. *ANESTHESIOLOGY* 1996; 84:821–33
38. Gross JB: When you breathe IN you inspire, when you DON'T breathe, you expire: New insights regarding opioid-induced ventilatory depression. *ANESTHESIOLOGY* 2003; 99:767–70
39. Narkiewicz K, van de Borne PJ, Pesek CA, Dyken ME, Montano N, Somers VK: Selective potentiation of peripheral chemoreflex sensitivity in obstructive sleep apnea. *Circulation* 1999; 99:1183–9
40. Deacon NL, Catcheside PG: The role of high loop gain induced by intermittent hypoxia in the pathophysiology of obstructive sleep apnoea. *Sleep Med Rev* 2015; 22:3–14
41. Jordan AS, McSharry DG, Malhotra A: Adult obstructive sleep apnoea. *Lancet* 2014; 383:736–47
42. Wellman A, Jordan AS, Malhotra A, Fogel RB, Katz ES, Schory K, Edwards JK, White DP: Ventilatory control and airway anatomy in obstructive sleep apnea. *Am J Respir Crit Care Med* 2004; 170:1225–32

43. Younes M, Ostrowski M, Thompson W, Leslie C, Shewchuk W: Chemical control stability in patients with obstructive sleep apnea. *Am J Respir Crit Care Med* 2001; 163:1181–90
44. Khoo MC, Kronauer RE, Strohl KP, Slutsky AS: Factors inducing periodic breathing in humans: A general model. *J Appl Physiol Respir Environ Exerc Physiol* 1982; 53:644–59
45. Eckert DJ: Phenotypic approaches to obstructive sleep apnoea: New pathways for targeted therapy. *Sleep Med Rev* 2018; 37:45–59
46. Eckert DJ, Owens RL, Kehlmann GB, Wellman A, Rahangdale S, Yim-Yeh S, White DP, Malhotra A: Eszopiclone increases the respiratory arousal threshold and lowers the apnoea/hypopnoea index in obstructive sleep apnoea patients with a low arousal threshold. *Clin Sci (Lond)* 2011; 120:505–14
47. Eckert DJ, Malhotra A, Wellman A, White DP: Trazodone increases the respiratory arousal threshold in patients with obstructive sleep apnea and a low arousal threshold. *Sleep* 2014; 37:811–9
48. Bernards CM, Knowlton SL, Schmidt DE, DePaso WJ, Lee MK, McDonald SB, Bains OS: Respiratory and sleep effects of remifentanyl in volunteers with moderate obstructive sleep apnea. *ANESTHESIOLOGY* 2009; 110:41–9
49. Wang D, Rowsell L, Wong K, Yee B, Eckert DJ, Somogyi A, Duffin J, Grunstein R: Identifying obstructive sleep apnea patients vulnerable to opioid-induced respiratory depression: A randomized double-blind placebo-controlled crossover trial. *Am J Respir Crit Care Med* 2016; 193:A4321
50. Wellman A, Malhotra A, Jordan AS, Stevenson KE, Gautam S, White DP: Effect of oxygen in obstructive sleep apnea: Role of loop gain. *Respir Physiol Neurobiol* 2008; 162:144–51
51. Horner RL: Respiratory physiology: Central neural control of respiratory neurons and motoneurons during sleep, *Principles and Practice of Sleep Medicine*. Edited by Kryger MH, Roth T, Dement WC, Philadelphia, PA, Elsevier, 2017, pp 155–66
52. Horner RL: Neural control of the upper airway: Integrative physiological mechanisms and relevance for sleep disordered breathing. *Compr Physiol* 2012; 2:479–535
53. Doufas AG: Opioids and sleep-disordered breathing. *ASA Monitor* 2017; 81:24–6
54. Mason M, Cates CJ, Smith I: Effects of opioid, hypnotic and sedating medications on sleep-disordered breathing in adults with obstructive sleep apnoea. *Cochrane Database Syst Rev* 2015:CD011090
55. Gross JB, Cerza DA: Ventilatory effects of medications used for moderate and deep sedation, *Pharmacology and Pathophysiology of the Control of Breathing*. Edited by Ward DS, Dahan A, Teppema LJ. Boca Raton, FL, Taylor & Francis Group, 2005, pp 513–70
